# Supplementary material for: Heterogeneous oxidative upcycling of polystyrene plastics to benzoic acid under air conditions
Source: Royal Society of Chemistry journal article supplement (doi:10.1039/d4cy00970c), 2024-01-01
Supplement: d4cy00970c1.pdf [file d4cy00970c1.pdf]

# Supporting Information

## Heterogeneous Oxidative Upcycling of Polystyrene Plastics to Benzoic Acid under Air Conditions

Chengyang Sun, Yong Guo, Xiaohui Liu, Yanqin Wang\*

Shanghai Key Laboratory of Functional Materials Chemistry, School of Chemistry and Molecular Engineering, East China University of Science and Technology, Shanghai 200237, P. R. China.

E-mail: [wangyanqin@ecust.edu.cn](mailto:wangyanqin@ecust.edu.cn)

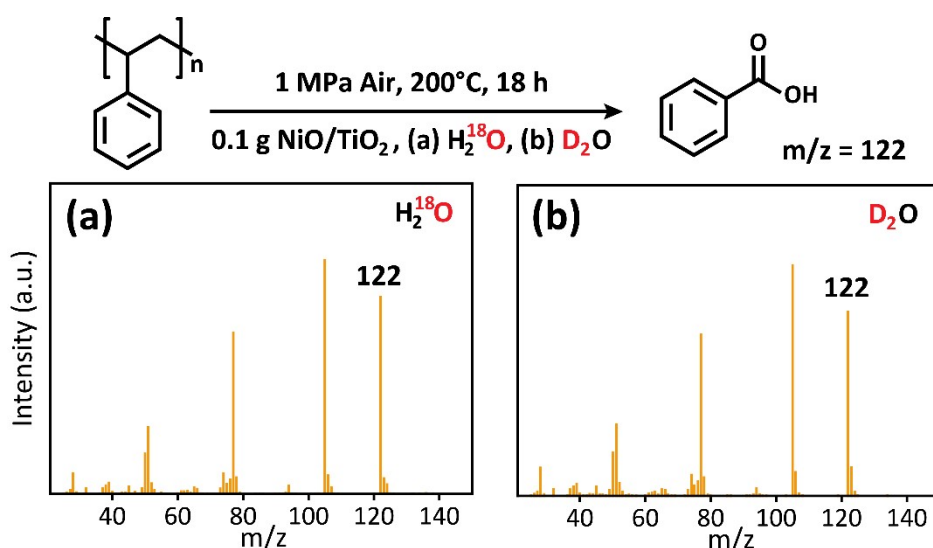

**Fig. S1.** Mass spectra of benzoic acid after isotopic experiments using (a) H<sub>2</sub><sup>18</sup>O and (b) D<sub>2</sub>O. Reaction conditions: 0.2 g PS, 0.1 g NiO/TiO<sub>2</sub>, 5 g H<sub>2</sub><sup>18</sup>O or D<sub>2</sub>O, 1 MPa Air, 200°C, 18 h.

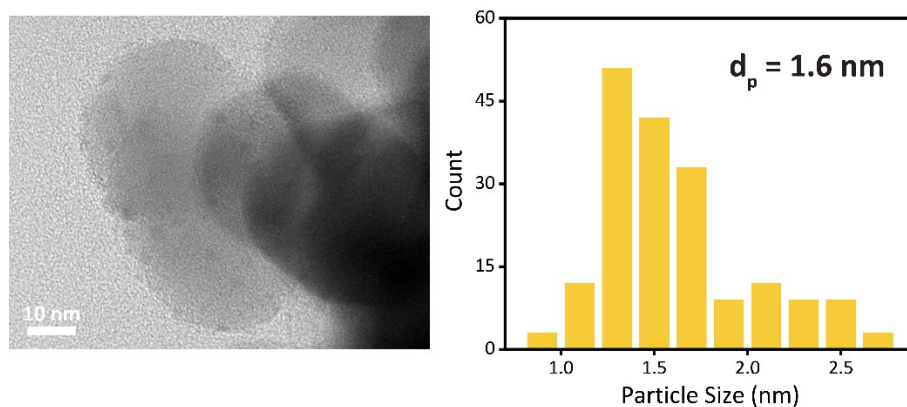

**Fig. S2.** TEM image and particle size distributions of 2NiO/TiO<sub>2</sub>.

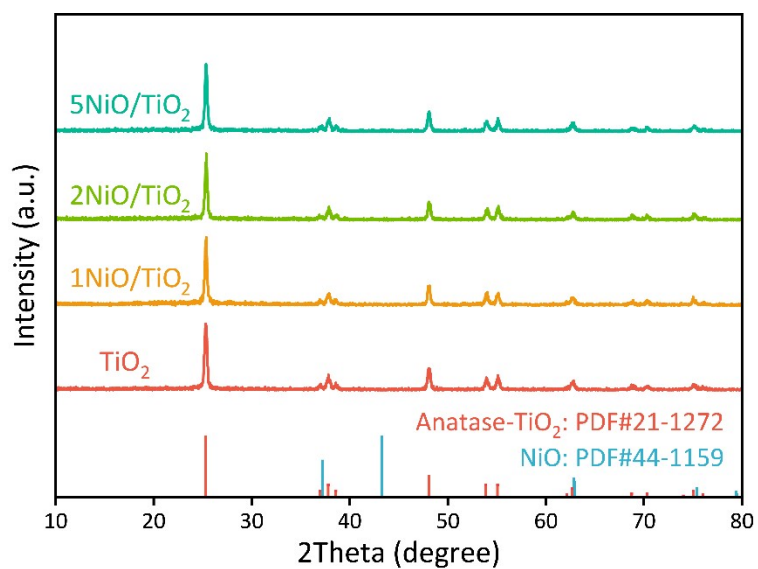

**Fig. S3.** XRD patterns of TiO<sub>2</sub>, 1NiO/TiO<sub>2</sub>, 2NiO/TiO<sub>2</sub> and 5NiO/TiO<sub>2</sub> catalysts.

In the XRD patterns of three NiO/TiO<sub>2</sub> catalysts, no diffraction peaks of NiO can be observed, indicating NiO species were well dispersed on TiO<sub>2</sub> support.

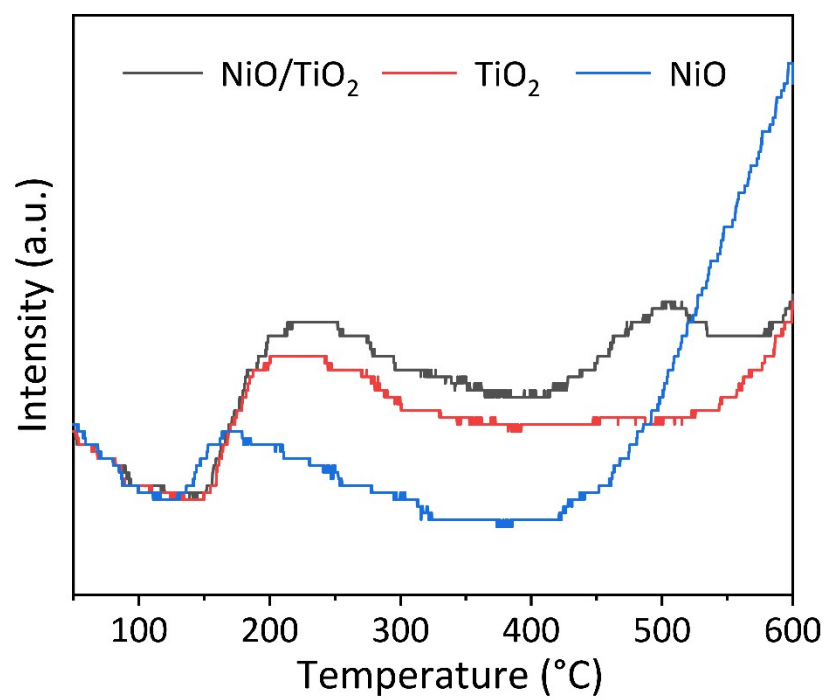

**Fig. S4.** O<sub>2</sub>-TPD profiles of NiO/TiO<sub>2</sub>, TiO<sub>2</sub> and NiO.

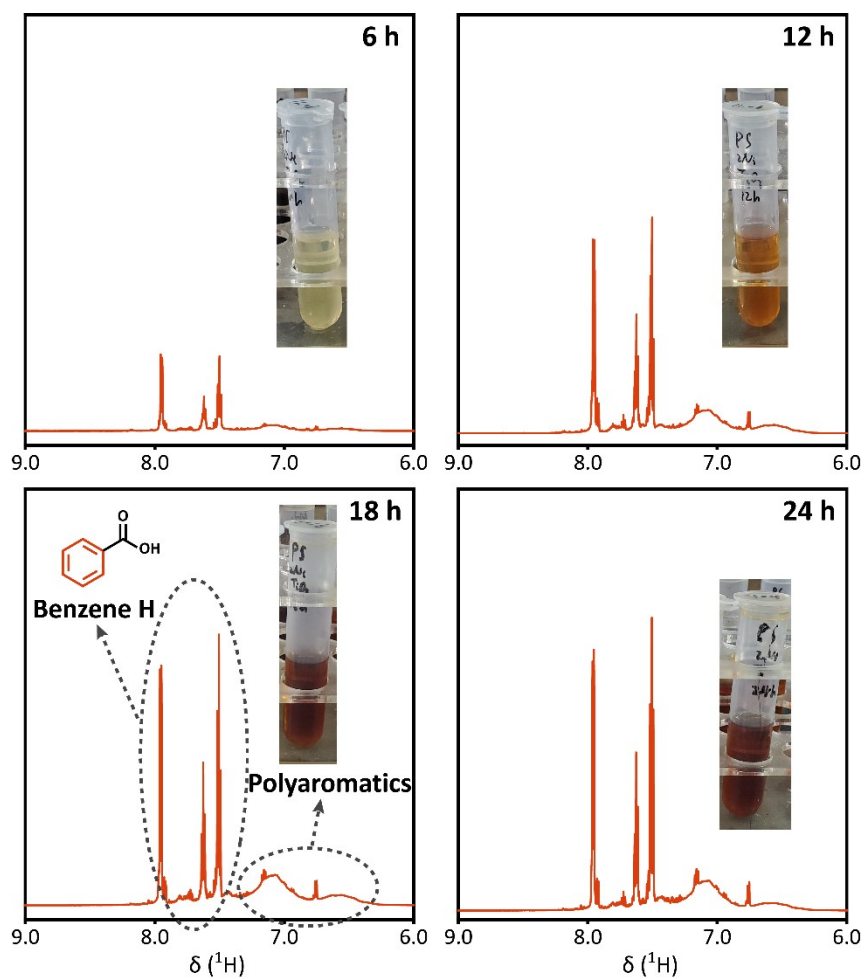

**Fig. S5.** Products analysis by  $^1\text{H}$  NMR (DMSO- $\text{D}_6$  as solvent) of different reaction time, and the corresponding photo showing the color of products.

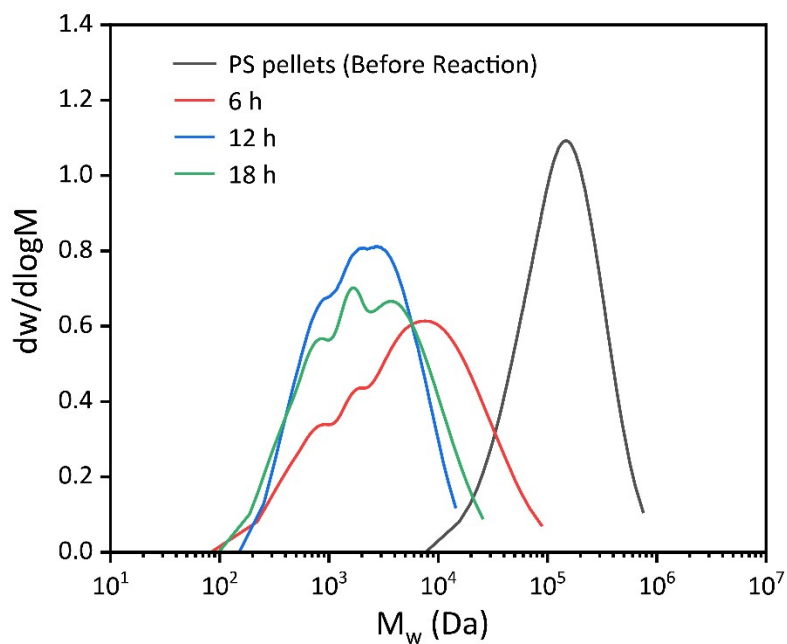

**Fig. S6.** Molecular weight distribution of polystyrene residues after different reaction time measured by GPC.

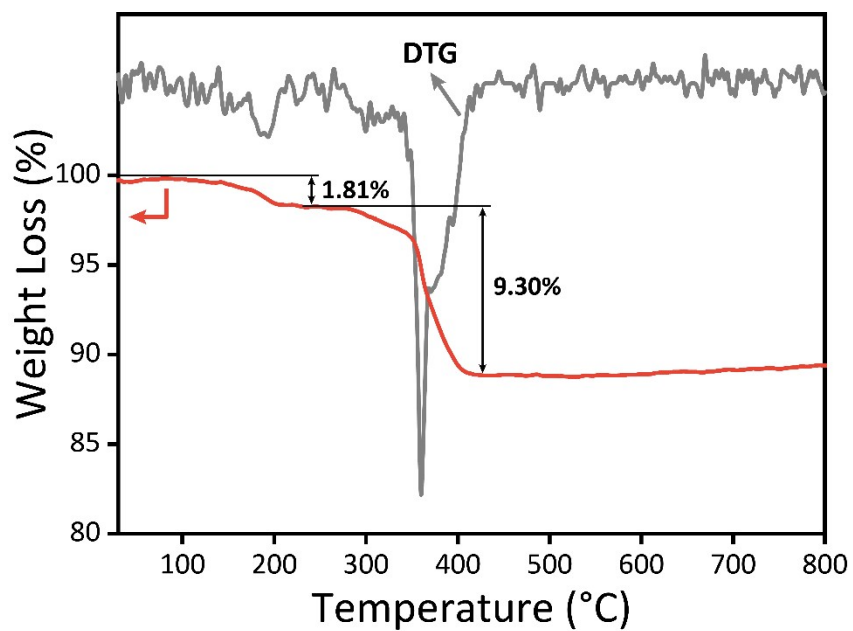

**Fig. S7.** TG and DTG profiles of spent NiO/TiO<sub>2</sub> catalyst.

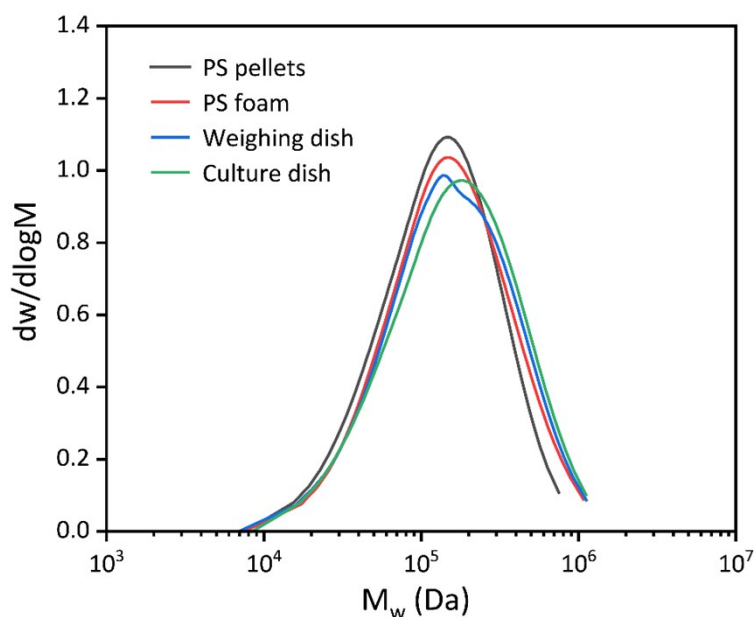

**Fig. S8.** Molecular weight distribution of the polystyrene samples measured by GPC.

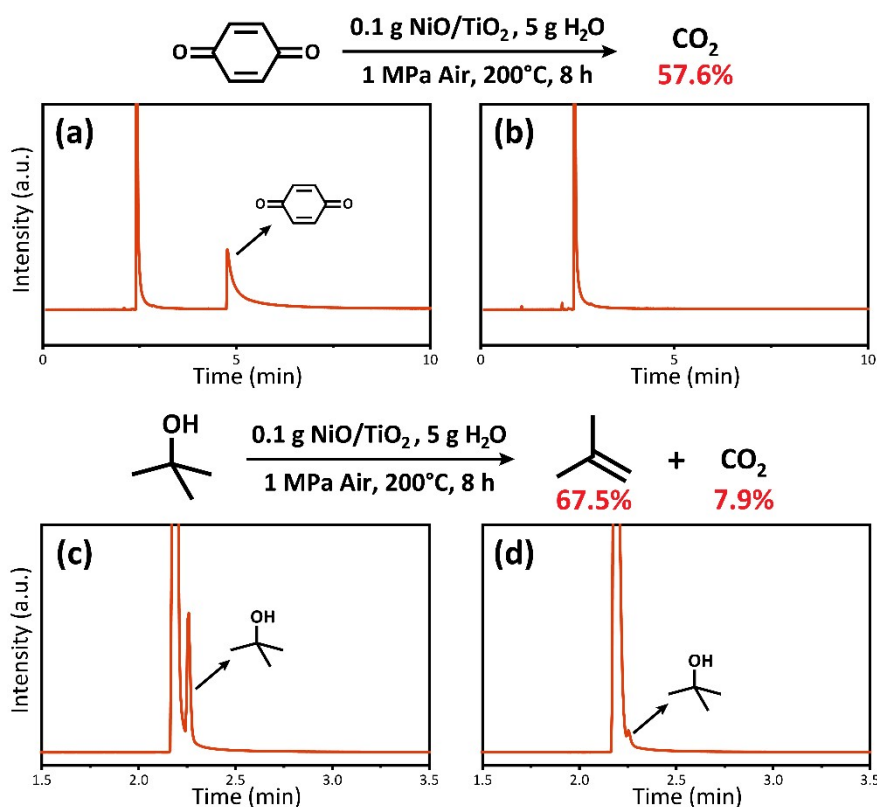

**Fig. S9.** GC/MS chromatograms and products indicating the consumption of radical quenchers: 1,4-benzoquinone (a) before reaction and (b) after 8 h oxidation, tert-butanol (c) before reaction and (d) after reaction. Reaction conditions: 0.1 g quencher, 0.1 g NiO/TiO<sub>2</sub>, 5 g H<sub>2</sub>O, 1 MPa Air, 200°C, 8 h.

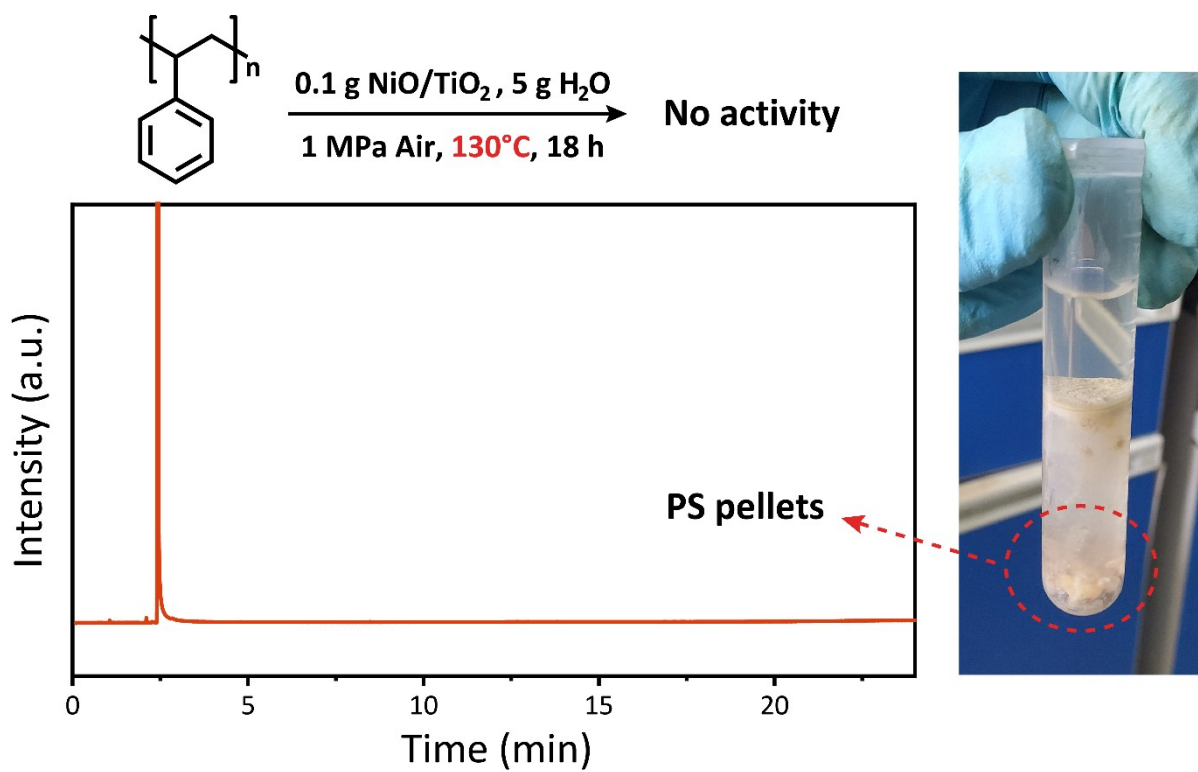

**Fig. S10.** GC/MS chromatogram of PS oxidative upcycling under lower temperature. Reaction conditions: 0.2 g PS, 0.1 g NiO/TiO<sub>2</sub>, 5 g H<sub>2</sub>O, 1 MPa Air, 130°C, 18 h.

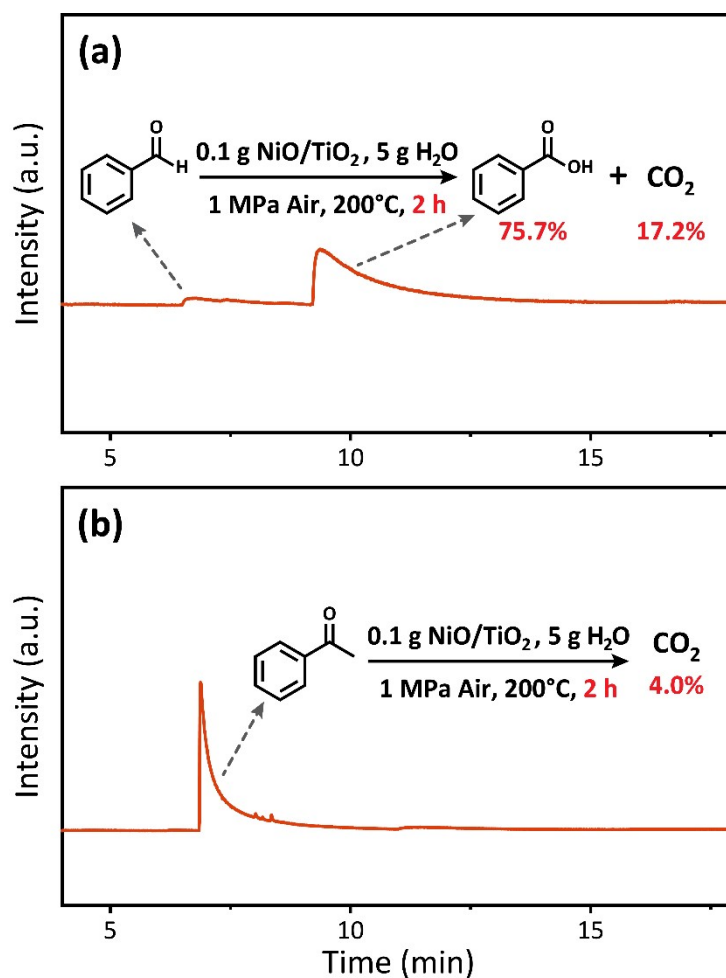

**Fig. S11.** GC/MS chromatograms and products of (a) benzaldehyde and (b) acetophenone after 2 h oxidation reaction. Reaction conditions: 0.2 g substrate, 0.1 g NiO/TiO<sub>2</sub>, 5 g H<sub>2</sub>O, 1 MPa Air, 200°C, 2 h.

**Table S1.** Summary of physical properties of NiO/TiO<sub>2</sub> catalysts.

| Entry | Catalyst                     | Surface area<br>(m <sup>2</sup> /g) | Pore volume<br>(cm <sup>3</sup> /g) | Pore size<br>(nm) | Ni content <sup>a</sup><br>(wt%) |
|-------|------------------------------|-------------------------------------|-------------------------------------|-------------------|----------------------------------|
| 1     | TiO <sub>2</sub>             | 43.3                                | 0.27                                | 15.4              | -                                |
| 2     | 1NiO/TiO <sub>2</sub>        | 36.0                                | 0.26                                | 17.5              | 1.6                              |
| 3     | 2NiO/TiO <sub>2</sub>        | 34.4                                | 0.25                                | 18.3              | 3.0                              |
| 4     | 5NiO/TiO <sub>2</sub>        | 31.6                                | 0.24                                | 18.6              | 6.0                              |
| 5     | 2NiO/TiO <sub>2</sub> -spent | -                                   | -                                   | -                 | 2.4                              |

<sup>a</sup> Determined by ICP-AES.



**Table S2.** Weight-average molecular weight ( $M_w$ ) and polymer dispersity index (PDI) of polystyrene samples obtained by GPC measurements.

| Entry | Sample     | $M_w$ (Da) | PDI  |
|-------|------------|------------|------|
| 1     | PS pellets | 177873     | 2.05 |
| 2     | PS-6 h     | 11724      | 6.51 |
| 3     | PS-12 h    | 4146       | 3.68 |
| 4     | PS-18 h    | 3052       | 2.51 |

**Table S3.** Weight-average molecular weight ( $M_w$ ) and polymer dispersity index (PDI) of polystyrene samples obtained by GPC measurements.

| Entry | Sample        | $M_w$ (Da) | PDI  |
|-------|---------------|------------|------|
| 1     | PS pellets    | 177873     | 2.05 |
| 2     | Culture dish  | 239342     | 2.35 |
| 3     | Weighing dish | 228416     | 2.35 |
| 4     | PS foam       | 217162     | 2.22 |

**Table S4.** Elementary composition of PS samples determined by Elemental analyzer.

| Entry | Sample                                         | C (wt%) | H (wt%) |
|-------|------------------------------------------------|---------|---------|
| 1     | PS-C <sub>8</sub> H <sub>8</sub> (Theoretical) | 92.3    | 7.7     |
| 2     | PS pellets                                     | 92.6    | 8.1     |
| 3     | Culture dish                                   | 92.7    | 7.9     |
| 4     | Weighing dish                                  | 88.6    | 7.9     |
| 5     | PS foam                                        | 91.3    | 7.6     |
